# Supplementary material for: Extending the wind profile beyond the surface layer by combining physical and machine learning approaches
Source: Copernicus journal article supplement (doi:10.5194/acp-24-4047-2024), 2024-04-04
Supplement: Supplementary file 1 [file acp-24-4047-2024-supplement.pdf]

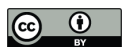

*Supplement of*

## **Extending the wind profile beyond the surface layer by combining physical and machine learning approaches**

**Boming Liu et al.**

*Correspondence to:* Xin Ma ([maxinwhu@whu.edu.cn](mailto:maxinwhu@whu.edu.cn)) and Jianping Guo ([jpguocams@gmail.com](mailto:jpguocams@gmail.com))

The copyright of individual parts of the supplement might differ from the article licence.

**Table S1.** Power law exponent of various terrain.

| <b>Terrain type</b>                   | <b>Power law exponent</b> |
|---------------------------------------|---------------------------|
| Lake, ocean, and smooth hard ground   | 0.10                      |
| Foot high grass on ground level       | 0.15                      |
| Tall crops, hedges, and shrubs        | 0.20                      |
| Wooded country                        | 0.25                      |
| Small town with some trees and shrubs | 0.30                      |
| City area with tall buildings         | 0.40                      |

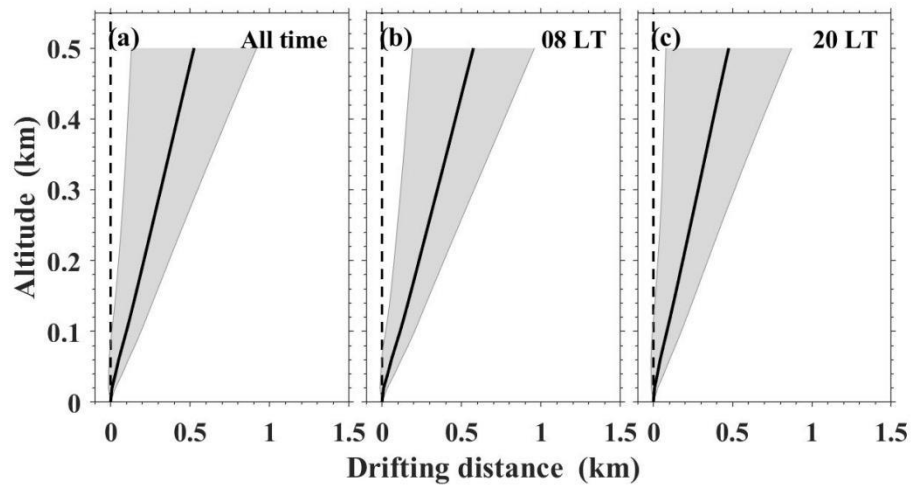

**Figure S1.** The drifting distance of RS observations over China. Black line represents mean drifting distance between the coordinates of RS and observation stations. Corresponding color shading areas represent the standard deviation.

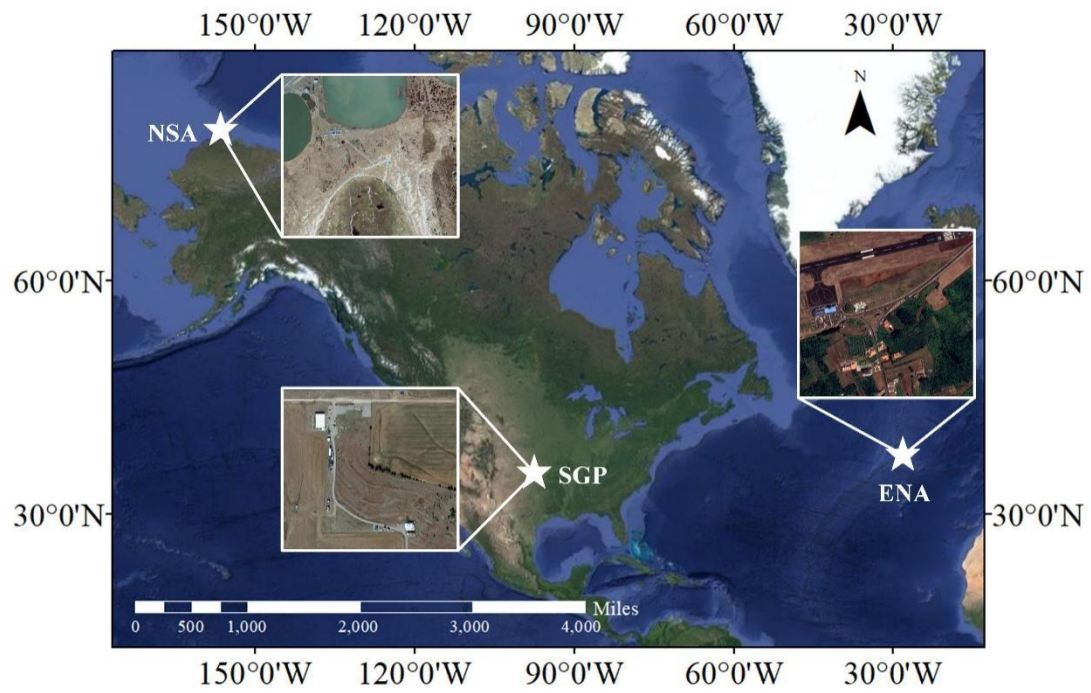

**Figure S2.** Geographical distribution and surface land cover type of three ARM station. The surface type photo is provided by Google Earth (© Google Maps).

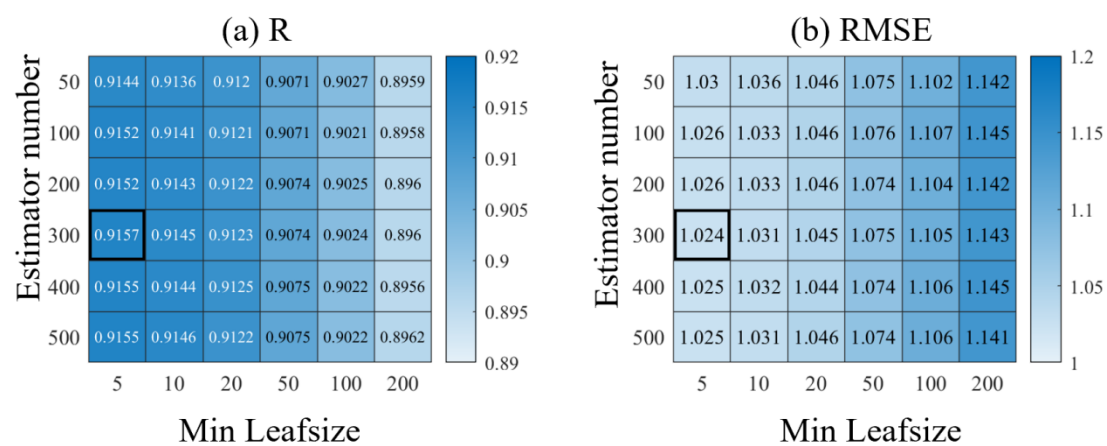

**Figure S3.** The (a) R and (b) RMSE distribution of RF with different parameters.

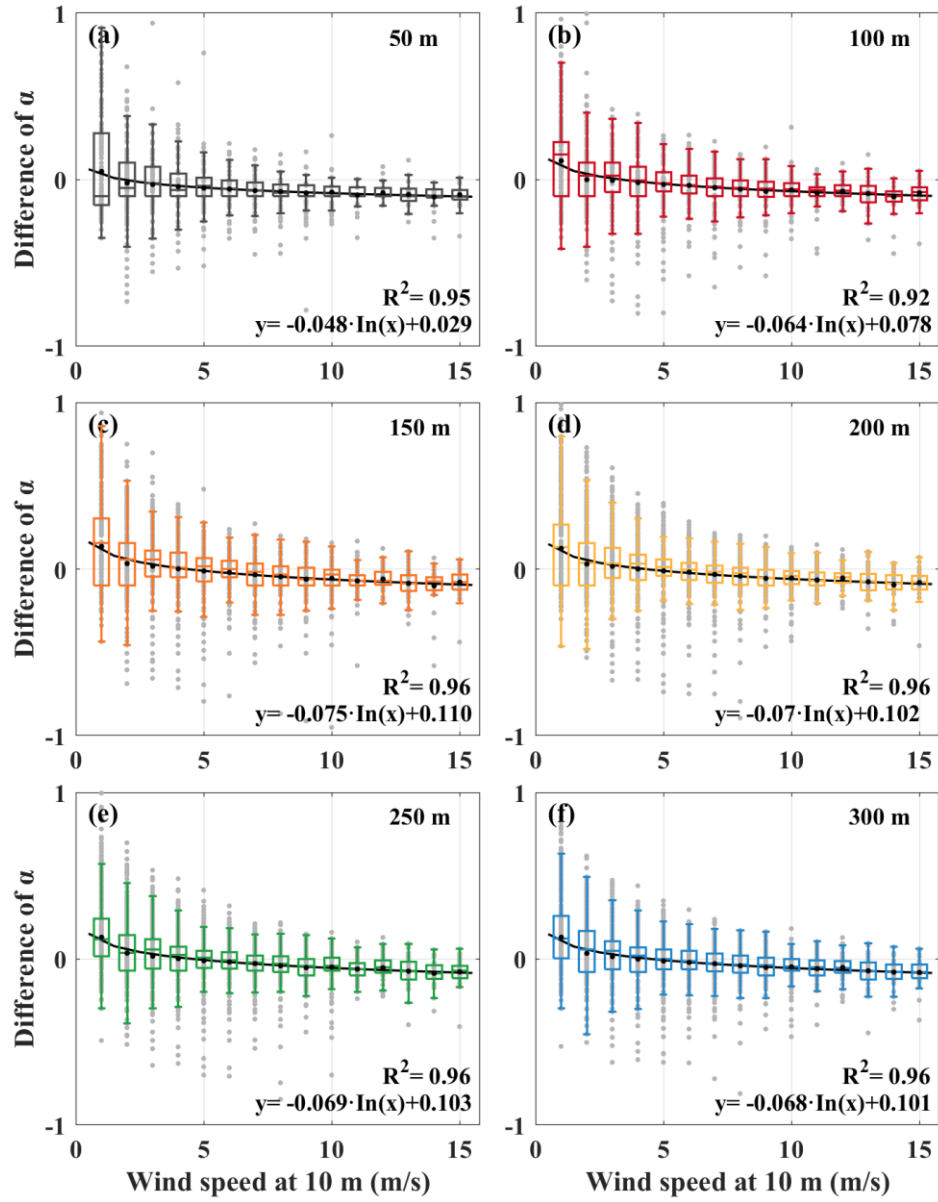

**Figure S4.** The  $\alpha$  bias (assumed value minus observed value) as a function of surface wind speed at (a) 50 m, (b) 100 m, (c) 150 m, (d) 200 m, (e) 250 m, and (f) 300 m.

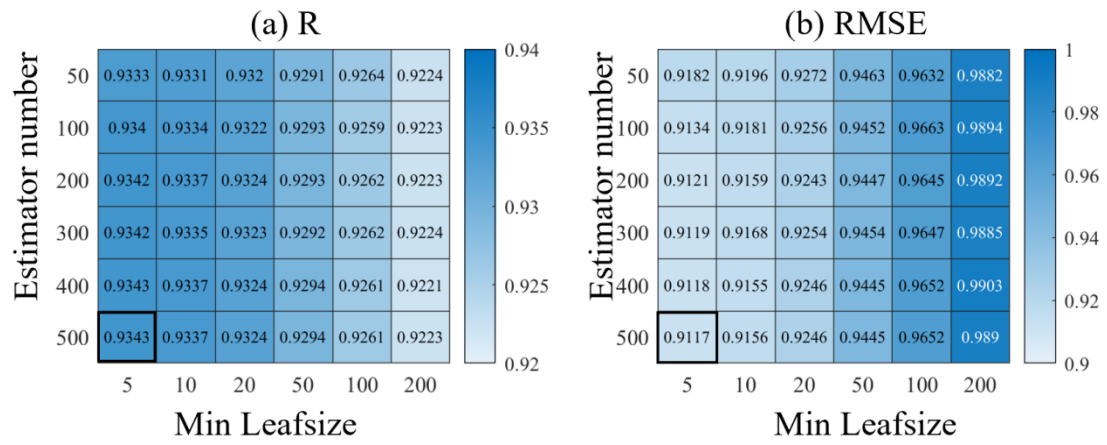

**Figure S5.** The (a) R and (b) RMSE distribution of PLM-RF with different parameters.

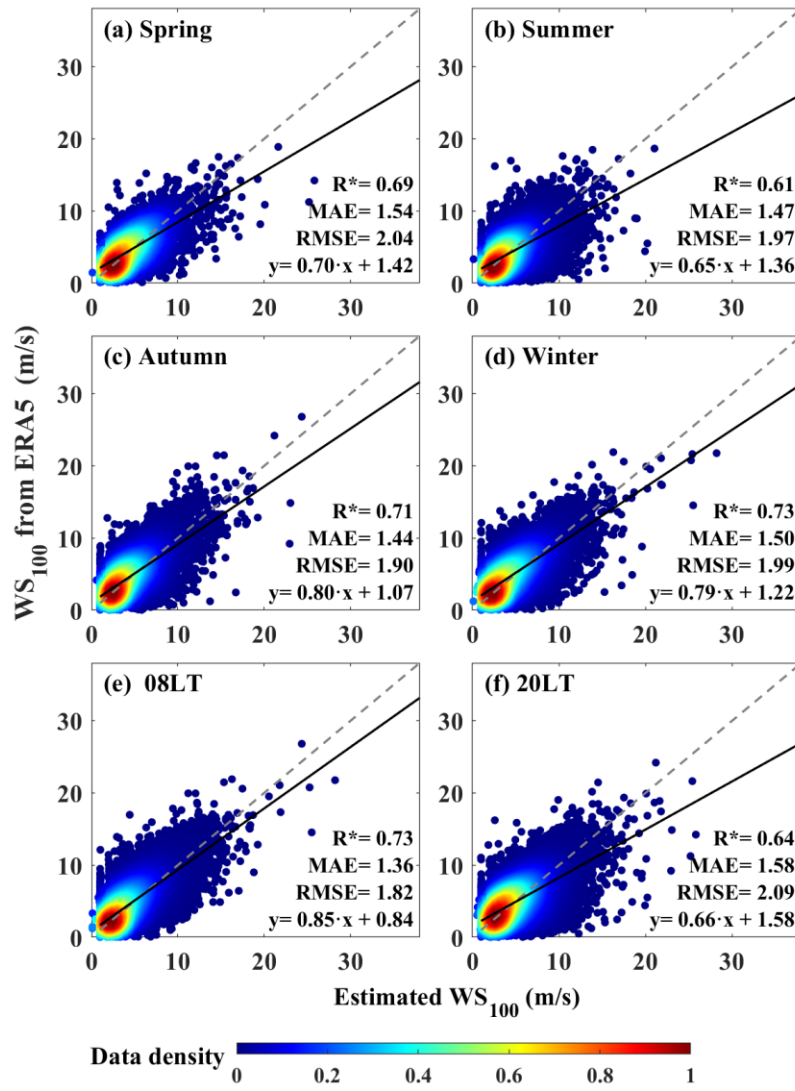

**Figure S6.** Comparisons between the WS<sub>100</sub> from ERA5 and from PLM-RF model in (a) spring, (b) summer, (c) autumn, (d) winter, (e) 0800 LT, and (f) 2000 LT.

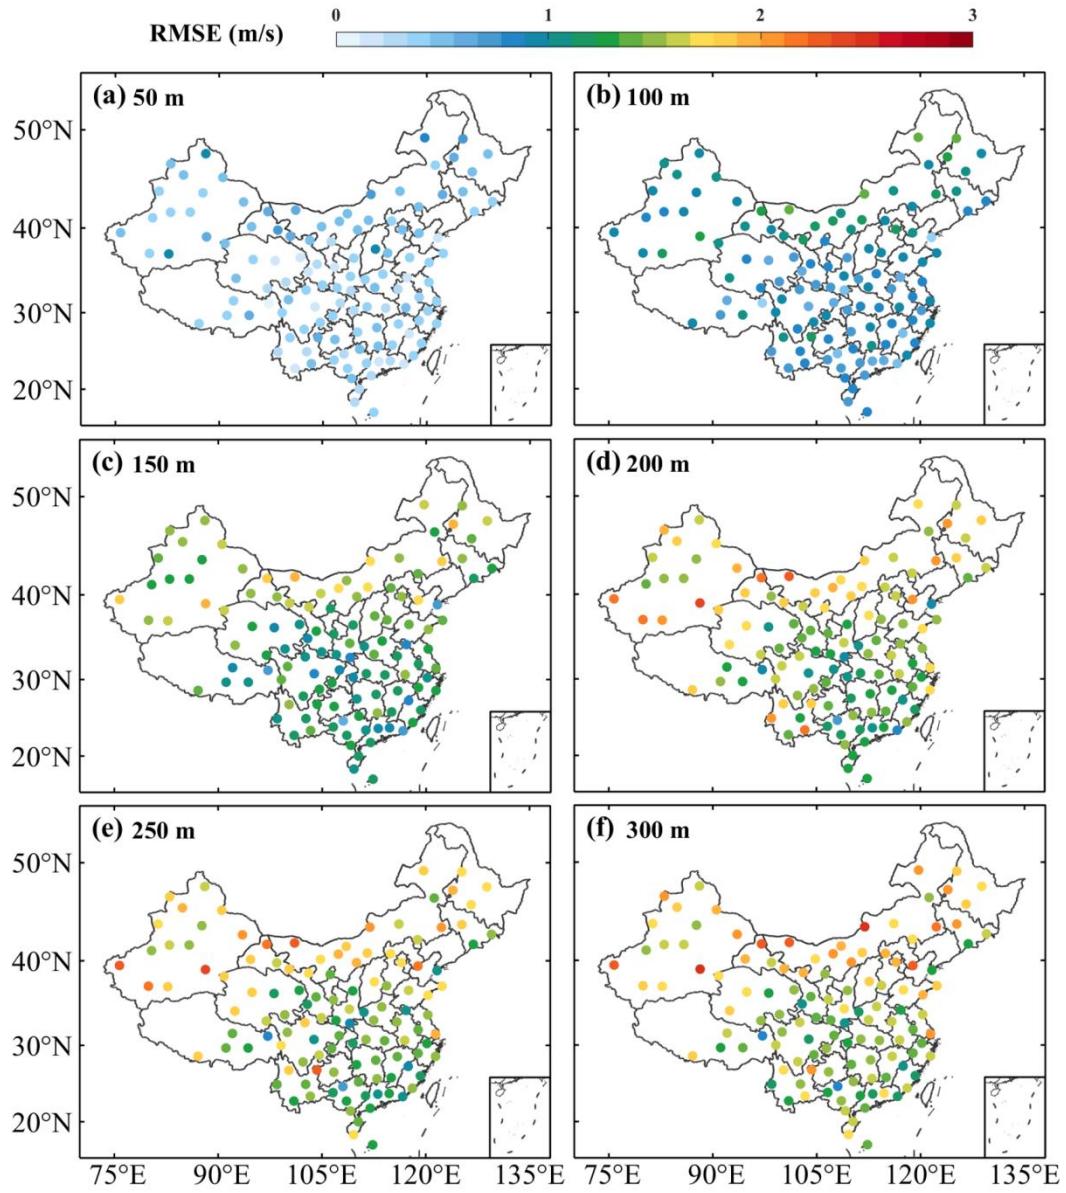

**Figure S7.** The spatial distributions of the RMSE between the estimated wind speed and observed wind speed for the PLM-RF model over 120 radiosonde stations in China at different heights: (a) 50 m, (b) 100 m, (c) 150 m, (d) 200 m, (e) 250 m, (f) 300 m.

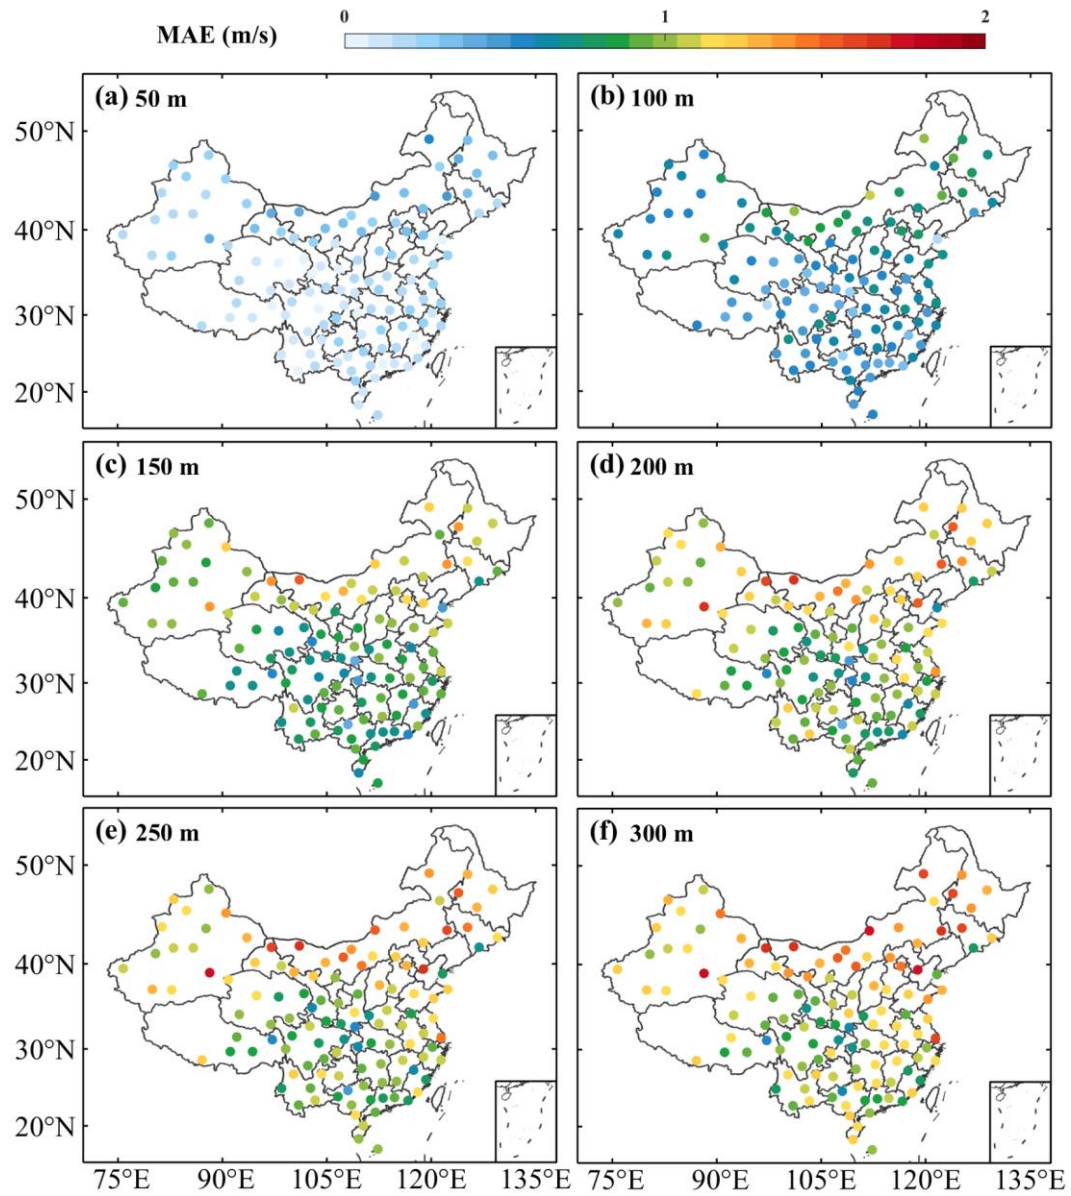

**Figure S8.** The spatial distributions of the MAE between the estimated wind speed and observed wind speed for the PLM-RF model over 120 radiosonde stations in China at different heights: (a) 50 m, (b) 100 m, (c) 150 m, (d) 200 m, (e) 250 m, (f) 300 m.

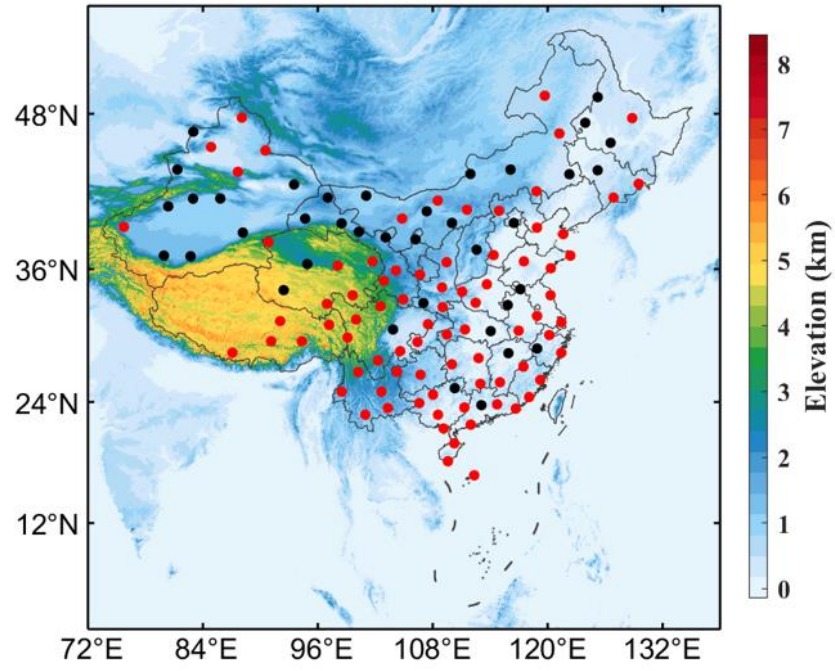

**Figure S9.** Geographical distribution of the radiosonde stations in China. Color bar represents elevation in kilometers. Red and black dots represent plain and highland sites, respectively.
